# Supplementary material
Source: publisher figshare collection journal article supplement (https://karger.figshare.com/ndownloader/files/12525290)
Supplement: Supplementary file 1 [file 12525290]

*General questions*

- *Sex*
- *Age*
- *Specialty*
- *Where do you practice?*
- *Which is your main field of interest?*
- *Do you perform thyroid ultrasound on a regular basis?*
- *Are you aware of the publication of ATA 2017 guidelines on the diagnosis and management of thyroid diseases in pregnancy and post-partum?*
- *How did you learn about ATA 2017 guidelines?*

*Screening for thyroid dysfunction*

- *In your daily clinical practice, do you acknowledge a patient with thyroid disease in childbearing age to have an endocrine consultation as soon as pregnancy is confirmed?*
- *Do you believe that TSH screening is warranted in all patients at the beginning of pregnancy?*
- *Did clinical trials show that untreated subclinical hypothyroidism or isolated hypothyroxinemia increase the risk of reduced IQ in the offspring?*
- *Do Ob/Gyn follow a standardized protocol for thyroid function testing in early pregnancy?*
- *Do you think that the number of patients referred to you in the last 5-10 years for known or suspected thyroid disease during pregnancy is:*

*Iodine supplementation*

- *Do you suggest iodine supplements in a pregnant patient with normal thyroid function?*
- *Do you suggest iodine supplements in a pregnant patient on levothyroxine replacement for hypothyroidism?*
- *How do you carry out iodine supplementation?*
- *Do you obtain urinary iodine excretion in a pregnant patient referred to you for a suspected alteration of thyroid function?*

*Diagnosis and TSH cut-off values*

- *Which do you consider as the normal upper limit of TSH in the first trimester in a TPO-Ab negative pregnant patient?*
- *Which of the followings do you prescribe for the evaluation of thyroid function in addition to TSH in a pregnant patient without known thyroid disease?*
- *Which of the followings do you obtain in a patient without known thyroid disease with TSH 3.8mIU/L at the beginning of pregnancy?*
- *Do you obtain thyroid ultrasound in a pregnant patient referred to you for a suspected thyroid dysfunction?*

*Thyroid management in spontaneous pregnancy*

- *What do you suggest in a TPO-Ab positive pregnant patient in the first trimester with TSH 2.5mIU/L?*
- *Do you increase the amount of levothyroxine in a pregnant patient with post-surgical hypothyroidism and TSH 2.5mIU/L before pregnancy?*
- *Do you increase the amount of levothyroxine dosage in a pregnant patient with autoimmune hypothyroidism and TSH 2.5mIU/L before pregnancy?*
- *Which is your TSH target throughout pregnancy in a hypothyroid patient on replacement treatment?*
- *In a TPO-Ab negative pregnant patient in the first trimester, with TSH 3.5mIU/L and normal thyroid ultrasound, do you suggest treatment with levothyroxine?*
- *In a TPO-Ab negative pregnant patient in the first trimester, with isolated hypothyroxinemia, do you suggest treatment with levothyroxine?*
- *In a TPO-Ab negative pregnant patient in the third trimester, with isolated hypothyroxinemia, do you suggest treatment with levothyroxine?*

*Thyroid management in assisted reproduction procedures*

- *In your opinion, which TSH value is correct before ovarian stimulation for assisted reproduction technology, in a patient with hypothyroidism on thyroxine replacement?*
- *When do you suggest thyroxine treatment before ovarian stimulation for medically assisted technology in a patient with autoimmune chronic thyroiditis with normal thyroid function?*
- *In a patient with autoimmune hypothyroidism on thyroxine replacement, when do you evaluate TSH levels during assisted reproduction technology?*
- *In a patient with chronic autoimmune thyroiditis and TSH 1.0mIU/L, undergoing assisted reproduction technology, do you suggest treatment with oral glucocorticoids?*
- *Thyroid monitoring during pregnancy*
- *Which timing do you suggest for TSH monitoring in a hypothyroid pregnant patient on replacement treatment?*
